# Supplementary material
Source: publisher figshare collection journal article supplement (https://asha.figshare.com/articles/dataset/_/5895976)
Supplement: Supplementary file 1 [file 1]

**Supplemental Material S2.** Subject diversity by four levels of mean length of utterance (MLU).

|                                   | # of<br>children | MLU Quartile 1<br>1.57–2.47 |          | MLU Quartile 2<br>2.48–2.81 |          | MLU Quartile 3<br>2.93–3.25 |          | MLU Quartile 4<br>3.27–4.61 |          |   |   |
|-----------------------------------|------------------|-----------------------------|----------|-----------------------------|----------|-----------------------------|----------|-----------------------------|----------|---|---|
|                                   | <i>n</i>         | <i>n</i>                    | <i>f</i> | <i>n</i>                    | <i>f</i> | <i>n</i>                    | <i>f</i> | <i>n</i>                    | <i>f</i> |   |   |
| Pronouns                          |                  |                             |          |                             |          |                             |          |                             |          |   |   |
| I                                 | 40               | 10                          | 205      | 10                          | 261      | 10                          | 336      | 10                          | 388      |   |   |
| YOU                               | 35               | 9                           | 50       | 8                           | 54       | 8                           | 90       | 10                          | 153      |   |   |
| WE                                | 28               | 6                           | 25       | 6                           | 9        | 7                           | 30       | 9                           | 66       |   |   |
| HE                                | 27               | 6                           | 12       | 6                           | 29       | 5                           | 32       | 10                          | 100      |   |   |
| IT                                | 26               | 5                           | 10       | 6                           | 18       | 7                           | 19       | 8                           | 27       |   |   |
| THEY                              | 14               | 2                           | 7        | 4                           | 5        | 4                           | 9        | 4                           | 12       |   |   |
| THAT                              | 13               | 1                           | 1        | 5                           | 5        | 4                           | 8        | 3                           | 6        |   |   |
| SHE                               | 11               | 2                           | 3        | 1                           | 6        | 3                           | 6        | 5                           | 41       |   |   |
| ONE                               | 11               | 2                           | 3        | 2                           | 5        | 2                           | 2        | 5                           | 14       |   |   |
| THIS                              | 9                | 1                           | 3        | 2                           | 8        | 3                           | 6        | 3                           | 6        |   |   |
| Pronouns produced by < 4 children |                  |                             |          |                             |          |                             |          |                             |          |   |   |
|                                   |                  | THOSE                       | 1        | 2                           |          | THOSE                       | 1        | 1                           | THOSE    | 1 | 1 |
|                                   |                  | WHO                         | 1        | 1                           |          | WHAT                        | 2        | 2                           | WHO      | 2 | 2 |
|                                   |                  | SOMEBODY                    | 1        | 1                           |          |                             |          |                             | SOMEBODY | 2 | 2 |
|                                   |                  | MINE                        | 1        | 1                           |          |                             |          |                             | MINE     | 1 | 3 |
|                                   |                  | ALL                         | 1        | 2                           |          |                             |          |                             | YOURS    | 1 | 1 |
|                                   |                  |                             |          |                             |          |                             |          |                             | NOBODY   | 1 | 1 |
| Nouns produced by ≥ 4 children    |                  |                             |          |                             |          |                             |          |                             |          |   |   |
| TEDDY                             | 18               | 3                           | 4        | 4                           | 26       | 6                           | 21       | 5                           | 7        |   |   |
| BABY                              | 16               | 3                           | 6        | 5                           | 11       | 4                           | 12       | 4                           | 5        |   |   |
| COW(S)                            | 5                | 1                           | 1        | 1                           | 1        | 2                           | 5        | 1                           | 1        |   |   |
| FARMER                            | 5                | 1                           | 1        | 1                           | 1        | 1                           | 2        | 2                           | 2        |   |   |
| HORSE                             | 4                |                             |          | 1                           | 1        | 3                           | 4        |                             |          |   |   |
| PIG(S)                            | 4                |                             |          |                             |          | 3                           | 4        | 1                           | 3        |   |   |
| BEAR                              | 4                | 2                           | 3        |                             |          | 2                           | 2        |                             |          |   |   |
|                                   |                  |                             |          |                             |          |                             |          |                             |          |   |   |

| Animate nouns produced by < 4 children   |   |   |          |   |   |          |   |   |           |   |   |
|------------------------------------------|---|---|----------|---|---|----------|---|---|-----------|---|---|
| BUNNY                                    | 1 | 2 | DANNY    | 1 | 1 | ENAME    | 1 | 1 | ANIMAL(S) | 2 | 2 |
| DINOSAUR                                 | 1 | 1 | ELEPHANT | 1 | 1 | GUY      | 1 | 1 | BUNNY     | 1 | 1 |
| LION                                     | 1 | 1 | FROGGY   | 1 | 1 | LION     | 1 | 1 | DANNY     | 1 | 1 |
| TEACHER                                  | 1 | 1 | GUY      | 1 | 5 | SHEEPS   | 1 | 1 | ENAME     | 1 | 1 |
|                                          |   |   | NINA     | 2 | 2 | SNAME    | 1 | 1 | FISHY     | 1 | 1 |
|                                          |   |   | PENGUINS | 1 | 1 | Compound | 1 | 1 | GIRL      | 1 | 1 |
|                                          |   |   | RABBIT   | 1 | 1 |          |   |   | GUY       | 1 | 3 |
|                                          |   |   |          |   |   |          |   |   | MOM       | 1 | 1 |
|                                          |   |   |          |   |   |          |   |   | SHEEP     | 1 | 1 |
|                                          |   |   |          |   |   |          |   |   | WOLF      | 1 | 2 |
|                                          |   |   |          |   |   |          |   |   | Compound  | 2 | 2 |
| Inanimate nouns produced by ≤ 2 children |   |   |          |   |   |          |   |   |           |   |   |
| EAR                                      | 1 | 1 | BOTTLES  | 1 | 2 | APPLE    | 1 | 1 | BASEBALL  | 1 | 1 |
| JUICE                                    | 1 | 1 | FORKS    | 1 | 1 | BLUE     | 1 | 1 | BLOCK     | 1 | 2 |
| TOWEL                                    | 1 | 1 | GLASSES  | 1 | 1 | BUBBLES  | 2 | 3 | BREAKFAST | 1 | 1 |
| TUMMY                                    | 1 | 1 | MILK     | 1 | 1 | DOOR     | 1 | 1 | CART      | 1 | 3 |
|                                          |   |   | PUMPKIN  | 1 | 1 | EGG      | 2 | 2 | CIRCLE    | 1 | 1 |
|                                          |   |   | STROLLER | 1 | 1 | EYES     | 1 | 1 | HAND      | 1 | 3 |
|                                          |   |   |          |   |   | FOOD     | 1 | 1 | HAT(S)    | 1 | 2 |
|                                          |   |   |          |   |   | GRASS    | 1 | 1 | LID       | 1 | 1 |
|                                          |   |   |          |   |   | MOUTH    | 1 | 2 | MOUTH     | 1 | 1 |
|                                          |   |   |          |   |   | NOSE     | 1 | 1 | MUSTACHE  | 1 | 1 |
|                                          |   |   |          |   |   | PIZZA    | 1 | 1 | SHORTS    | 1 | 1 |
|                                          |   |   |          |   |   | PLATE    | 1 | 2 | THINGS    | 1 | 1 |
|                                          |   |   |          |   |   | PRETZEL  | 1 | 1 | TWISTER   | 1 | 1 |
|                                          |   |   |          |   |   | SHOES    | 1 | 1 | WIND      | 1 | 1 |
|                                          |   |   |          |   |   | SPOON    | 1 | 1 |           |   |   |
|                                          |   |   |          |   |   | TRACTOR  | 2 | 3 |           |   |   |
|                                          |   |   |          |   |   | WAGON    | 1 | 1 |           |   |   |

*Note.* Errors in pronoun case (e.g., *me/I*), own name/*I*, and addressee's name/*you* are not included; *n* = number of children producing each subject in total sample or by quartile; *f* = sum of subject uses by *n* children in each quartile.
