# Supplementary material
Source: publisher figshare collection journal article supplement (https://asha.figshare.com/articles/dataset/_/5895976)
Supplement: Supplementary file 3 [file 1]

**Supplemental Material S3.** Index of Productive Syntax items and their relation to English sentence structure.

| Item                                        | Description                                                                                                                                                                                                                                 | Relation to knowledge of sentence structure                                                                                               |
|---------------------------------------------|---------------------------------------------------------------------------------------------------------------------------------------------------------------------------------------------------------------------------------------------|-------------------------------------------------------------------------------------------------------------------------------------------|
| S2<br>S4                                    | Subject–verb sequence<br>Subject–verb–object sequence                                                                                                                                                                                       | Basic sentence types                                                                                                                      |
| N8                                          | Two-word NP before verb                                                                                                                                                                                                                     | Phrasal elaboration of the subject NP;<br>only third-person subjects can be elaborated                                                    |
| V4<br>V6<br>V10<br>V12<br>V13<br>V15<br>V16 | Copula linking two nominals<br>Auxiliary BE, DO, HAVE in VP<br>Third-person singular present tense suffix<br>Regular past-tense suffix<br>Past-tense auxiliary<br>Copula, modal, or auxiliary for emphasis or ellipsis<br>Past-tense copula | Morphemes that mark sentences for tense and agreement<br><br>Third-person singular subjects create opportunity for V10                    |
| V9<br>V11                                   | Modal preceding verb<br>Past-tense modal                                                                                                                                                                                                    | Phrasal elaboration of the VP; modals fill the same position in sentence structure as tense/agreement morphemes                           |
| Q5<br>Q7                                    | Negative morpheme between a subject and verb<br>Negation of copula, modal, or auxiliary                                                                                                                                                     | Negation of predicate; appears in sentence structure between the subject NP and predicate                                                 |
| Q6<br>Q8                                    | <i>Wh</i> – question with inverted modal, copula, or auxiliary<br>Yes/no question with inverted modal, copula, or auxiliary                                                                                                                 | Transformation of declarative sentences into questions through movement/inversion of modal, copula, or auxiliary with grammatical subject |
| SS12                                        | Conjoined sentences                                                                                                                                                                                                                         | Compound sentence formed by joining two sentences with conjunction <i>and</i> , <i>but</i> , or <i>or</i>                                 |
| SS11<br>SS13<br>SS16<br>SS17<br>SS19        | Propositional complement<br><i>Wh</i> – clause<br>Relative clause<br>Infinitive clause: new subject<br>Fronted or center-embedded subordinate clause                                                                                        | Complex sentences formed by incorporating a dependent clause into the structure of the main clause                                        |

*Note.* NP = noun phrase; VP = verb phrase.
